# Supplementary material for: TNF-α promotes osteocyte necroptosis by upregulating TLR4 in postmenopausal osteoporosis
Source: Research Square preprint supplement (doi:10.21203/rs.3.rs-3397193/v1), 2023-10-05
Supplement: Supplementary file 2 [file 39ac8bb4ef35050b1e54de32.xlsx]

## Sheet: Table 1
	Control group	Osteoporosis group	Severe osteoporosis group	P
Age (y)	42.90 ± 16.05	66.73 ± 10.26	66.50 ± 10.58	<.001
menopause age (y)	-	50.00 ± 2.95	48.50 ± 2.35	0.282
BMD (T)	-0.30 ± 0.38	-3.02 ± 0.41*	-3.88 ± 0.97*	<.001
height (cm)	156.60 ± 4.48	156.40 ± 4.90	160.00 ± 5.80	0.307
weight (kg)	47.90 ± 2.77	47.47 ± 3.52	47.67 ± 4.23	0.954
